# Supplementary material for: PI3K drives the de novo synthesis of coenzyme A from vitamin B5
Source: PubMed Central journal article supplement (PMC9352595; doi:10.1038/s41586-022-04984-8), 2022-07-27
Supplement: 41586_2022_4984_MOESM3_ESM.pdf [file 41586_2022_4984_MOESM3_ESM.pdf]

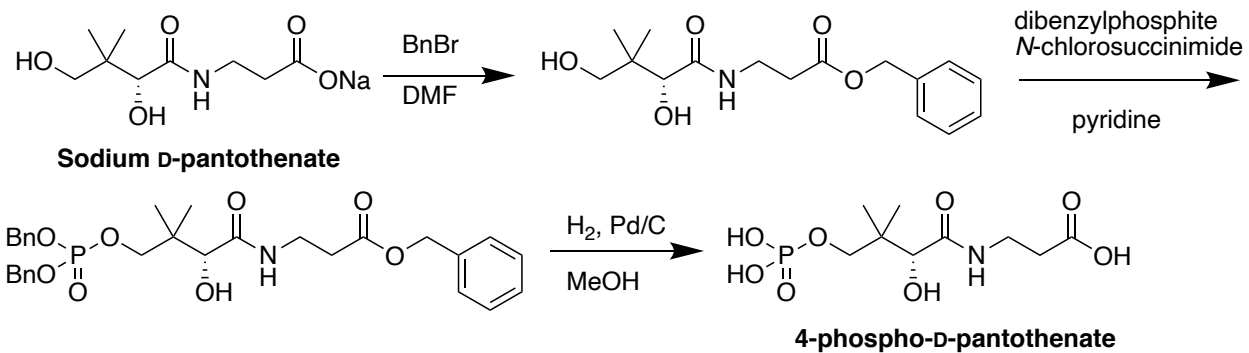

**Supplemental Information Fig. 2.** Diagram of steps for 4<sup>1</sup>-phosphopantothenate synthesis.
